# Supplementary material for: Activation of non-canonical WNT signaling in human visceral adipose tissue contributes to local and systemic inflammation
Source: PubMed Central journal article supplement (PMC5725530; doi:10.1038/s41598-017-17509-5), 2017-12-11
Supplement: 41598_2017_17509_MOESM1_ESM.pdf [file 41598_2017_17509_MOESM1_ESM.pdf]

**SUPPLEMENTARY INFORMATION**

**Activation of non-canonical WNT signaling in human visceral adipose tissue contributes to local and systemic inflammation**

María A. Zuriaga<sup>1</sup>, José J. Fuster<sup>1</sup>, Melissa G. Farb<sup>2</sup>, Susan MacLauchlan<sup>1</sup>, Rosa Bretón-Romero<sup>2</sup>, Shakun Karki<sup>2</sup>, Donald T. Hess<sup>3</sup>, Caroline M. Apovian<sup>4</sup>, Naomi M. Hamburg<sup>2</sup>, Noyan Gokce<sup>2</sup> and Kenneth Walsh<sup>1\*</sup>

<sup>1</sup>Molecular Cardiology, Whitaker Cardiovascular Institute, Boston University School of Medicine, 715 Albany Street, W-611, Boston, MA, USA

<sup>2</sup>Cardiovascular Medicine, Whitaker Cardiovascular Institute, Boston University School of Medicine, 715 Albany Street, E-7 C.H.U., Boston, MA, USA

<sup>3</sup>Department of General Surgery, Boston University School of Medicine, Boston, MA, USA

<sup>4</sup>Department of Medicine, Section of Endocrinology, Diabetes and Nutrition, Boston University School of Medicine, Boston, MA, USA.

**Corresponding author:**

Kenneth Walsh, Ph.D.

Boston University School of Medicine

715 Albany Street, W-611

Boston, MA, 02118 USA

Phone: 617-414-2390

Fax: 617-414-2391

E-mail: [kxwalsh@bu.edu](mailto:kxwalsh@bu.edu)

| <b>Clinical parameter</b>        | All subjects | Non-diabetics | Diabetics   |
|----------------------------------|--------------|---------------|-------------|
| Age (years)                      | 40 ± 2       | 36 ± 2        | 47 ± 3      |
| Female sex (%)                   | 73           | 85            | 53          |
| BMI (kg/m <sup>2</sup> )         | 45 ± 1       | 43 ± 2        | 48 ± 2      |
| Weight (kg)                      | 128 ± 4      | 122 ± 4       | 135 ± 8     |
| Waist circumference (cm)         | 128 ± 3      | 123 ± 3       | 134 ± 5     |
| Waist to hip ratio               | 0.95 ± 0.02  | 0.92 ± 0.02   | 0.98 ± 0.03 |
| Fasting glucose (mg/dl)          | 120 ± 12     | 90 ± 2        | 162 ± 23    |
| Plasma Insulin (mIU/ml)          | 16 ± 2       | 16 ± 3        | 12 ± 3      |
| HbA1C (%)                        | 6.1 ± 0.29   | 5.5 ± 0.1     | 6.8 ± 0.6   |
| Triglycerides (mg/dl)            | 122 ± 13     | 99 ± 7        | 160 ± 29    |
| Hypercholesterolemia (%)         | 20           | 4             | 47          |
| Total cholesterol (mg/dl)        | 173 ± 6      | 175 ± 7       | 171 ± 10    |
| LDL-cholesterol (mg/dl)          | 106 ± 4      | 110 ± 6       | 99 ± 5      |
| hsCRP (mg/dl)                    | 10.14 ± 1.3  | 8.76 ± 1.59   | 12 ± 2      |
| Systolic Blood Pressure (mm Hg)  | 127 ± 2      | 125 ± 1       | 132 ± 4     |
| Diastolic Blood Pressure (mm Hg) | 75 ± 1       | 72 ± 2        | 76 ± 2      |
| Diabetes (%)                     | 39           | 0             | 100         |
| Coronary Heart Disease (%)       | 4.5          | 0             | 12          |
| Hypertension (%)                 | 50           | 33            | 76          |
| Hypoglycemic use (%)             | 29.5         | 4             | 76          |
| Lipid lowering use (%)           | 16           | 0             | 41          |
| Anti-inflammatory use (%)        | 20.5         | 22            | 18          |

**Table S1. Study population characteristics.** Data expressed as Mean ± SEM

| Correlation     | Diabetics |          | Non-diabetics |          |
|-----------------|-----------|----------|---------------|----------|
|                 | r         | p        | r             | p        |
| ROR2/VANGL2     | 0.68      | < 0.01   | 0.68          | < 0.01   |
| ROR2/FZD7       | 0.76      | < 0.001  | 0.54          | < 0.01   |
| ROR2/PRICKLE1   | 0.64      | < 0.01   | 0.54          | < 0.01   |
| ROR2/DSH1       | 0.62      | < 0.01   | 0.03          | n.s.     |
| ROR2/DSH2       | 0.52      | < 0.05   | 0.01          | n.s.     |
| ROR2/DSH3       | 0.52      | < 0.05   | 0.23          | n.s.     |
| ROR2/ANKRD6     | 0.68      | < 0.01   | 0.23          | n.s.     |
| VANGL2/FZD7     | 0.67      | < 0.01   | 0.53          | < 0.01   |
| VANGL2/PRICKLE1 | 0.77      | < 0.001  | 0.81          | < 0.0001 |
| VANGL2/DSH1     | 0.91      | < 0.0001 | 0.55          | < 0.01   |
| VANGL2/DSH2     | 0.89      | < 0.0001 | 0.55          | < 0.01   |
| VANGL2/DSH3     | 0.86      | < 0.0001 | 0.61          | < 0.01   |
| VANGL2/ANKRD6   | 0.90      | < 0.0001 | 0.66          | < 0.001  |
| FZD7/PRICKLE1   | 0.72      | < 0.001  | 0.22          | < 0.05   |
| FZD7/DSH1       | 0.58      | < 0.05   | 0.002         | n.s.     |
| FZD7/DSH2       | 0.52      | < 0.05   | 0.04          | n.s.     |
| FZD7/DSH3       | 0.51      | < 0.05   | 0.11          | n.s.     |
| FZD7/ANKRD6     | 0.72      | < 0.01   | 0.16          | n.s.     |
| WNT5A/VANGL2    | 0.55      | < 0.05   | 0.03          | n.s.     |
| WNT5A/PRICKLE1  | 0.50      | < 0.05   | -0.03         | n.s.     |
| WNT5A/DSH1      | 0.64      | < 0.01   | 0.16          | n.s.     |
| WNT5A/DSH2      | 0.60      | < 0.05   | -0.06         | n.s.     |
| WNT5A/DSH3      | 0.66      | < 0.01   | 0.16          | n.s.     |
| WNT5A/ANKRD6    | 0.53      | < 0.05   | 0.03          | n.s.     |

**Table S2. Correlations between the expression of WNT5A/PCP signaling genes in visceral fat of diabetic and non-diabetic individuals.** Pearson's correlation coefficients (r) were used to analyze the association between variables. n.s.: non-statistically significant (p>0.1)

| Correlation              | Diabetics |         | Non-diabetics |        |
|--------------------------|-----------|---------|---------------|--------|
|                          | r         | p       | r             | p      |
| WNT5A/IL6                | 0.80      | < 0.001 | 0.46          | < 0.05 |
| DSH1/IL6                 | 0.50      | < 0.05  | 0.09          | n.s.   |
| DSH2/IL6                 | 0.49      | < 0.05  | 0.18          | n.s.   |
| DSH3/IL6                 | 0.57      | < 0.05  | 0.03          | n.s.   |
| WNT5A/waist-to-hip ratio | 0.59      | < 0.05  | 0.43          | 0.052  |
| DSH1/waist-to-hip ratio  | -0.09     | n.s.    | -0.33         | n.s.   |
| DSH2/waist-to-hip ratio  | -0.22     | n.s.    | -0.36         | n.s.   |
| DSH3/waist-to-hip ratio  | -0.07     | n.s.    | 0.06          | n.s.   |
| WNT5A/hsCRP              | 0.54      | 0.056   | 0.01          | n.s.   |
| DSH1/hsCRP               | 0.56      | < 0.05  | -0.30         | n.s.   |
| DSH2/hsCRP               | 0.47      | 0.10    | -0.10         | n.s.   |
| DSH3/hsCRP               | 0.52      | 0.07    | -0.22         | n.s.   |

**Table S3. Correlations between the expression of *WNT5A* and *DSH1,2,3* in visceral fat and *IL6* expression in this depot, waist-to-hip ratio and circulating CRP levels in diabetic and non-diabetic individuals.** Pearson's correlation coefficients (r) were used to analyze the association between variables. n.s.: non-statistically significant (p>0.1)

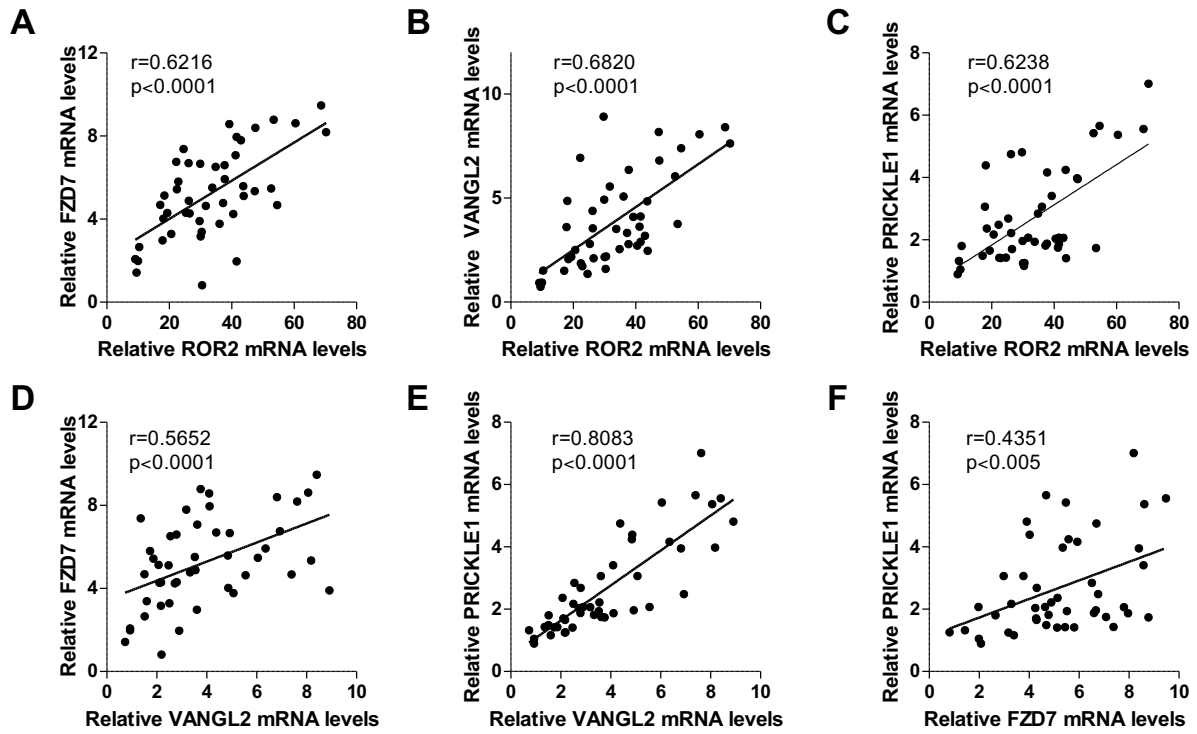

**Figure S1. Coordinated upregulation of PCP core receptor components in visceral adipose tissue.**

A-F. Pearson's coefficients (r) were used to analyze the correlation between the expression of main PCP receptor components in VAT.

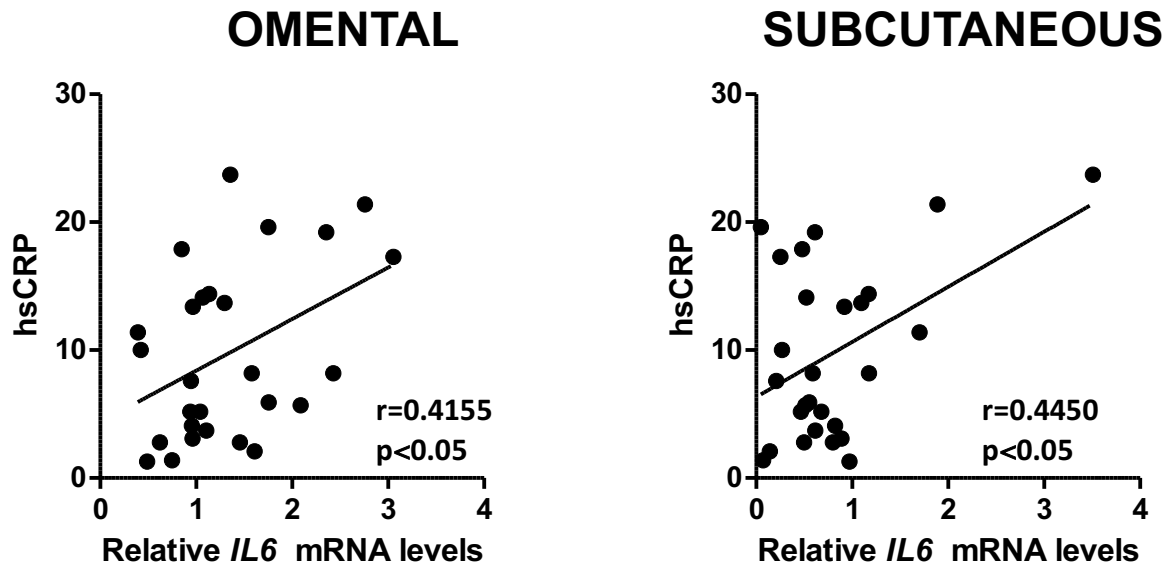

**Figure S2. Positive correlation between *IL6* expression and hsCRP in VAT and SAT. Pearson's coefficients ( $r$ ) were used to analyze the correlation.**
